# Supplementary material
Source: PubMed Central journal article supplement (PMC9950363)
Supplement: 41541_2023_622_MOESM1_ESM.pdf [file 41541_2023_622_MOESM1_ESM.pdf]

1 **Supplementary Information**

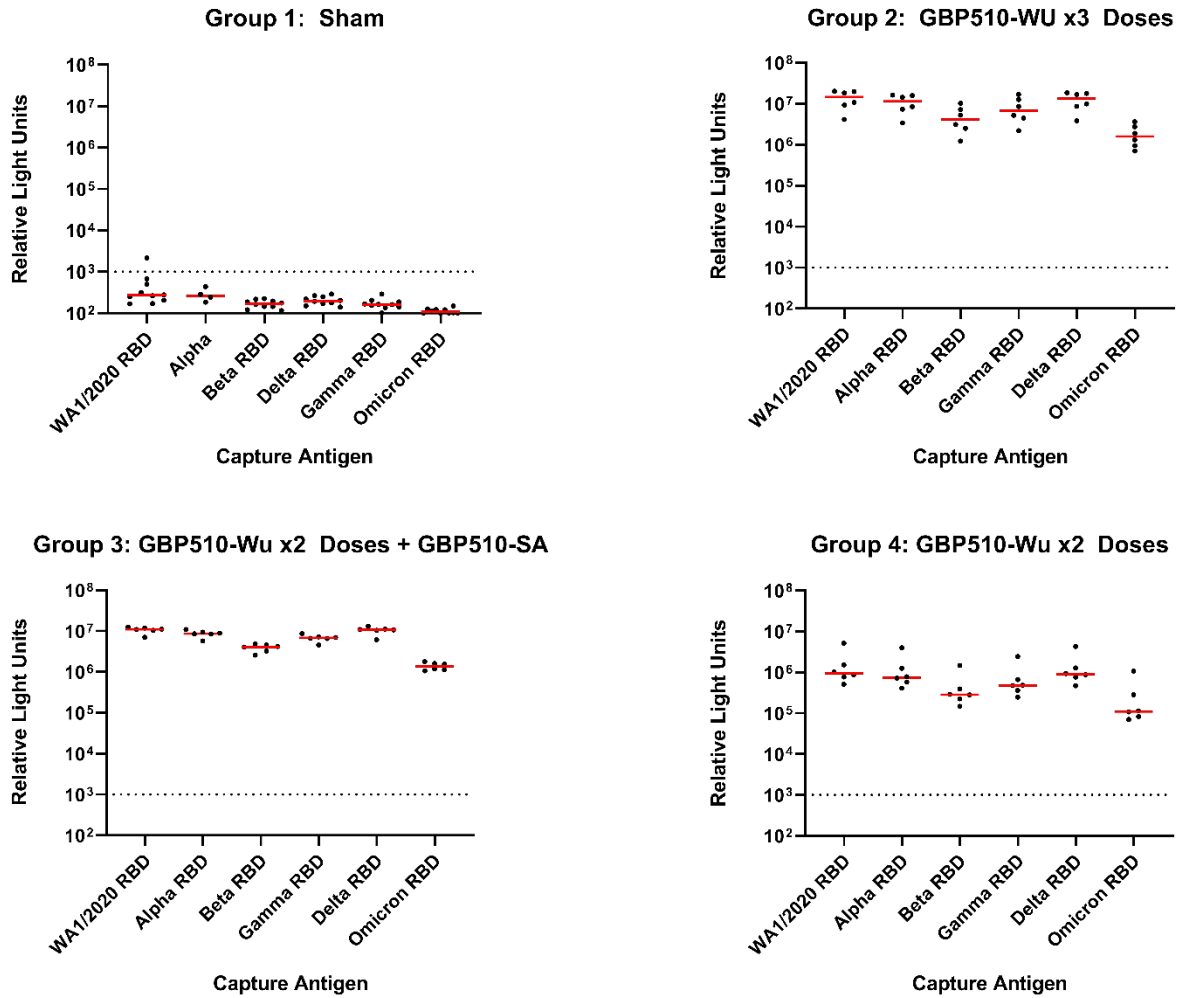

2

3 **Supplementary Figure 1.** Electro-chemiluminescent (ECLA) measured humoral responses to  
4 ancestral (WA1/2020) and variant strain RBDs including Alpha, Beta, Delta, Gamma, and  
5 Omicron (BA.1).

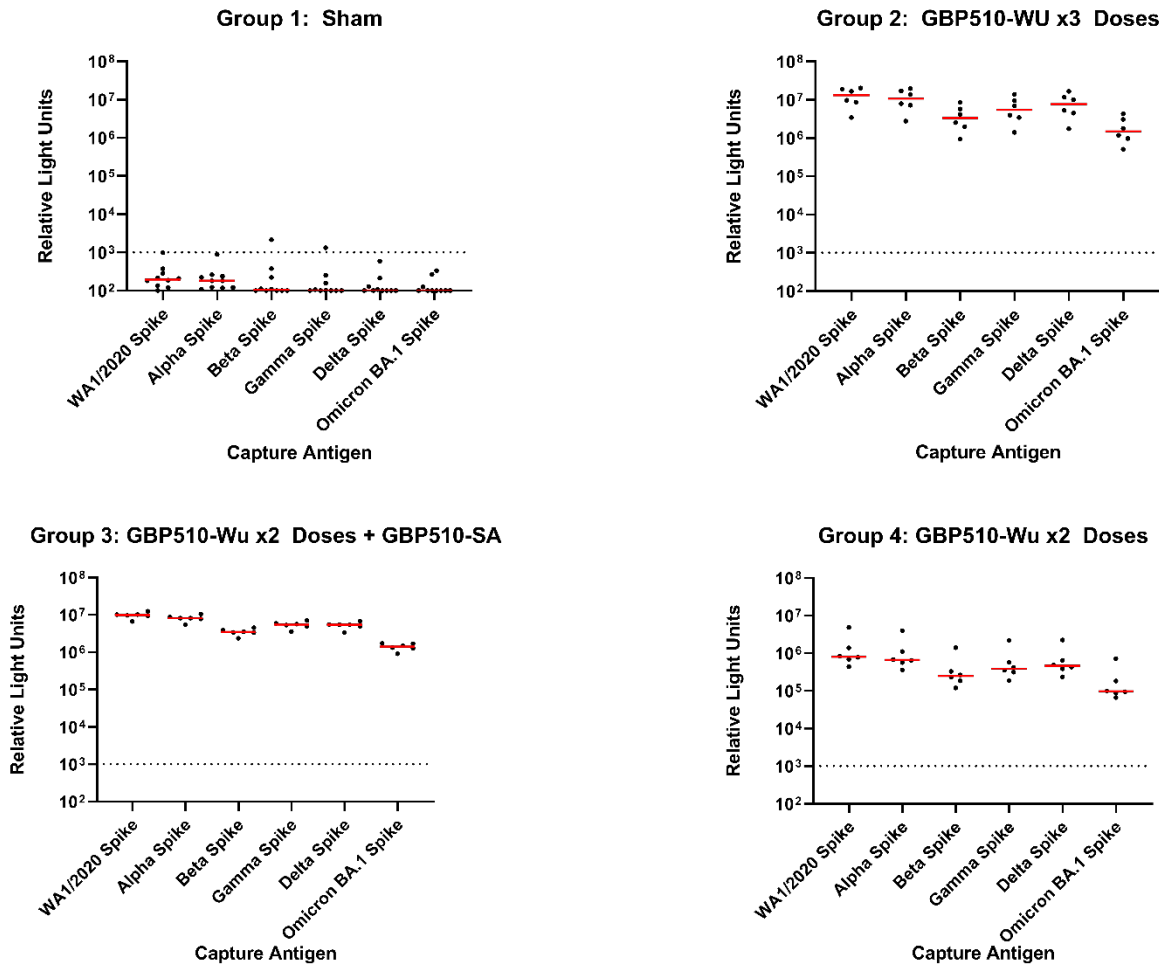

6

7 **Supplementary Figure 2.** Electro-chemiluminescent (ECLA) measured humoral responses to  
 8 ancestral (WA1/2020) and variant strain Spikes including Alpha, Beta, Delta, Gamma, and  
 9 Omicron (BA.1).

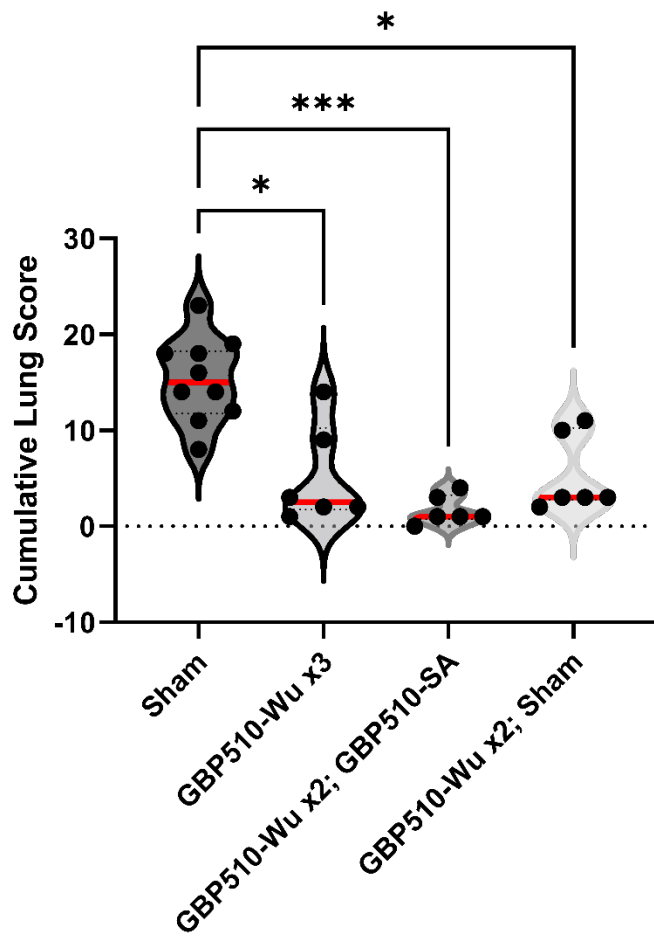

10

11 **Supplementary Figure 3.** Cumulative lung score via histopathology for each of the groups

12 studied. Vaccinated groups were compared by Kruskal-Wallis test to the sham group,  $P=0.0173$

13 for GBP510-Wu x3,  $P=0.0002$  for GBP510-Wu x2; GBP510-SA, and  $P=0.0483$  for GBP510-Wu

14 x2.
